# Supplementary material for: Effect of thermal treatments on the matrix components, inherent glycemic potential, and bioaccessibility of phenolics and micronutrients in pearl millet rotis
Source: Royal Society of Chemistry journal article supplement (doi:10.1039/d2fo03143d), 2023-01-01
Supplement: d2fo03143d1.pdf [file d2fo03143d1.pdf]

**Table S1** Proximate analysis includes yield of total protein, soluble protein, Total starch, total fat, total ash, and total moisture content in native and treated pearl millet flour

| Samples    | Total protein            | Soluble protein          | Total starch              | Total fat                | Total ash                | Moisture                 |
|------------|--------------------------|--------------------------|---------------------------|--------------------------|--------------------------|--------------------------|
| MPMH 17 C  | 7.96 ± 0.02 <sup>a</sup> | 1.45 ± 0.06 <sup>a</sup> | 64.44 ± 1.44 <sup>a</sup> | 7.35 ± 0.06 <sup>a</sup> | 1.34 ± 0.01 <sup>a</sup> | 10.0 ± 0.02 <sup>a</sup> |
| MPMH 17 HT | 7.67 ± 0.02 <sup>a</sup> | 0.62 ± 0.01 <sup>b</sup> | 57.51 ± 1.17 <sup>b</sup> | 6.95 ± 0.04 <sup>b</sup> | 1.42 ± 0.02 <sup>b</sup> | 13.5 ± 0.02 <sup>b</sup> |
| MPMH 17 MW | 7.82 ± 0.01 <sup>a</sup> | 1.21 ± 0.06 <sup>a</sup> | 62.19 ± 0.63 <sup>a</sup> | 7.24 ± 0.01 <sup>a</sup> | 1.50 ± 0.01 <sup>c</sup> | 7.4 ± 0.02 <sup>c</sup>  |
| MPMH 17 IR | 7.70 ± 0.02 <sup>a</sup> | 1.25 ± 0.02 <sup>a</sup> | 62.55 ± 0.63 <sup>a</sup> | 7.19 ± 0.06 <sup>a</sup> | 1.46 ± 0.02 <sup>c</sup> | 8.8 ± 0.01 <sup>d</sup>  |

All the values are given in percentage. Values with same upper-case letter are not significantly different ( $P>0.05$ ) according to Tukey's test. Native (C) Flour; Hydrothermal (HT) treated flour; Microwave (MW) treated flour; Infrared (IR) treated flour.

**Table S2** Concentration of iron and zinc in flour of MPMH 17 pearl millet variety

| <b>Sample</b> | <b>Iron conc ppm/ g flour</b> | <b>Zinc conc ppm/ g flour</b> |
|---------------|-------------------------------|-------------------------------|
| MPMH 17       | 39.0 ± 1.42 <sup>a</sup>      | 31.5 ± 1.07 <sup>a</sup>      |

All values are given in ppm/ g flour and values with a different letter in each column indicates significantly different at  $p < 0.05$ .

**Table S3** Concentration of iron and zinc in intestinal digesta released during *in vitro* digestion of roti prepared from native and treated pearl millet flour

| Samples    | Iron conc in intestinal digesta | Zinc conc in intestinal digesta |
|------------|---------------------------------|---------------------------------|
| MPMH 17 C  | 5.4 ± 0.14 <sup>a</sup>         | 5.2 ± 0.28 <sup>a</sup>         |
| MPMH 17 HT | 4.6 ± 0.14 <sup>a</sup>         | 4.4 ± 0.28 <sup>a</sup>         |
| MPMH 17 MW | 5.6 ± 0.28 <sup>a</sup>         | 5.6 ± 0.14 <sup>a</sup>         |
| MPMH 17 IR | 5.0 ± 0.14 <sup>a</sup>         | 5.4 ± 0.14 <sup>a</sup>         |

All values are given in ppm/ g digesta and values with same upper-case letter are not significantly different (P>0.05) according to Tukey's test. Native (C) Flour; Hydrothermal (HT) treated flour; Microwave (MW) treated flour; Infrared (IR) treated flour.
